# Supplementary material for: Platelet Serotonin (5-HT) Concentration, Platelet Monoamine Oxidase B (MAO-B) Activity and HTR2A, HTR2C, and MAOB Gene Polymorphisms in Asthma
Source: MDPI journal article supplement (doi:10.3390/biom13050800), 2023-05-08
Supplement: s1 [file s1]

**Table S1.** The influence of various independent variables on the platelet 5-HT levels and platelet MAO-B activity in asthma patients and healthy control subjects, assessed by multiple linear regression analysis.

| Multiple linear regression analysis | Platelet 5-HT concentration                                                | Platelet MAO-B activity                                                      |
|-------------------------------------|----------------------------------------------------------------------------|------------------------------------------------------------------------------|
| <b>Model summary</b>                | adjR <sup>2</sup> =0.068; $\Delta$ R <sup>2</sup> =0.111; F=2.585; p=0.004 | adjR <sup>2</sup> =0.110; $\Delta$ R <sup>2</sup> =0.151; F=2.585; p=0.00008 |
| <b>Diagnosis</b>                    | $\beta$ =0.194; p=0.008                                                    | $\beta$ =0.026; p=0.712                                                      |
| <b>Age</b>                          | $\beta$ =-0.050; p=0.506                                                   | $\beta$ =-0.167; p=0.023                                                     |
| <b>Gender</b>                       | $\beta$ =-0.111; p=0.444                                                   | $\beta$ =0.266; p=0.00008                                                    |
| <b>BMI</b>                          | $\beta$ =0.052; p=0.193                                                    | $\beta$ =-0.175; p=0.009                                                     |
| <b>Smoking</b>                      | $\beta$ =-0.013; p=0.840                                                   | $\beta$ =0.040; p=0.520                                                      |
| <b>HTR2A rs6314</b>                 | $\beta$ =-0.138; p=0.045                                                   | $\beta$ =0.079; p=0.234                                                      |
| <b>HTR2A rs6313</b>                 | $\beta$ =0.020; p=0.762                                                    | $\beta$ =-0.001; p=0.985                                                     |
| <b>HTR2C rs3813929</b>              | $\beta$ =-0.107; p=0.160                                                   | $\beta$ =-0.044; p=0.557                                                     |
| <b>HTR2C rs518147</b>               | $\beta$ =-0.060; p=0.423                                                   | $\beta$ =-0.039; p=0.598                                                     |
| <b>MAOB rs1799836</b>               | $\beta$ =0.084; p=0.327                                                    | $\beta$ =0.102; p=0.221                                                      |
| <b>MAOB rs6651806</b>               | $\beta$ =-0.041; p=0.640                                                   | $\beta$ =-0.077; p=0.371                                                     |

| Variables                    | Area under the curve (AUC) |
|------------------------------|----------------------------|
| Platelet 5-HT concentration  | 0.374                      |
| Platelet MAO-B activity      | 0.650                      |
| MAOB rs1799836 polymorphism  | 0.494                      |
| MAOB rs6651806 polymorphism  | 0.500                      |
| HTR2A rs6314 polymorphism    | 0.542                      |
| HTR2A rs6313 polymorphism    | 0.544                      |
| HTR2C rs3813929 polymorphism | 0.471                      |
| HTR2C rs518147 polymorphism  | 0.500                      |

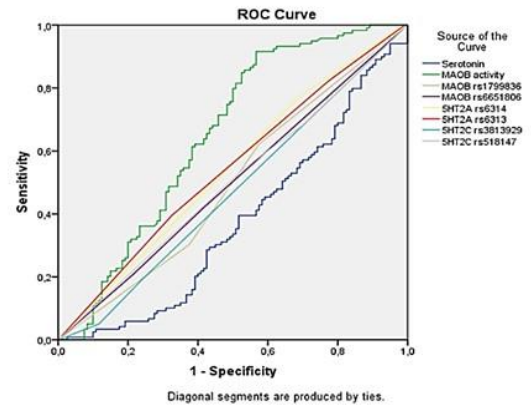

**Figure S1.** Receiver operating characteristic curve (ROC) analysis was performed on the whole sample (120 control subjects + 120 asthma patients) and area under the curve (AUC) was determined for variables such as platelet 5-HT concentration and MAO-B activity, as well as gene polymorphisms (MAOB rs1799836, MAOB rs6651806, HTR2A rs6314, HTR2A rs6313, HTR2C rs3813929, and HTR2C rs518147).

**Table S2.** The influence of various independent variables on the platelet 5-HT levels and platelet MAO-B activity in subjects with severe and non-severe asthma, assessed by multiple linear regression analysis.

|                        | Platelet 5-HT concentration                                        | Platelet MAO-B activity                                           |
|------------------------|--------------------------------------------------------------------|-------------------------------------------------------------------|
| <b>Model summary</b>   | adjR <sup>2</sup> =-0.021;ΔR <sup>2</sup> =0.074; F=0.776; p=0.663 | adjR <sup>2</sup> =0.092;ΔR <sup>2</sup> =0.177; F=2.090; p=0.027 |
| <b>Diagnosis</b>       | β=0.030; p=0.761                                                   | β=0.101; p=0.280                                                  |
| <b>Age</b>             | β=-0.017; p=0.876                                                  | β=-0.212; p=0.046                                                 |
| <b>Gender</b>          | β=-0.005; p=0.960                                                  | β=0.216; p=0.017                                                  |
| <b>BMI</b>             | β=0.089; p=0.375                                                   | β=-0.110; p=0.243                                                 |
| <b>Smoking</b>         | β=-0.027; p=0.780                                                  | β=0.240; p=0.010                                                  |
| <b>HTR2A rs6314</b>    | β=-0.166; p=0.098                                                  | β=0.055; p=0.556                                                  |
| <b>HTR2A rs6313</b>    | β=0.021; p=0.830                                                   | β=-0.030; p=0.744                                                 |
| <b>HTR2C rs3813929</b> | β=-0.143; p=0.214                                                  | β=-0.193; p=0.078                                                 |
| <b>HTR2C rs518147</b>  | β=-0.075; p=0.504                                                  | β=-0.062; p=0.562                                                 |
| <b>MAOB rs1799836</b>  | β=0.047; p=0.708                                                   | β=-0.055; p=0.642                                                 |
| <b>MAOB rs6651806</b>  | β=-0.235; p=0.078                                                  | β=-0.014; p=0.908                                                 |

| Variables                    | Area under the curve (AUC) |
|------------------------------|----------------------------|
| Platelet 5-HT concentration  | 0.456                      |
| Platelet MAO-B activity      | 0.510                      |
| MAOB rs1799836 polymorphism  | 0.463                      |
| MAOB rs6651806 polymorphism  | 0.458                      |
| HTR2A rs6314 polymorphism    | 0.521                      |
| HTR2A rs6313 polymorphism    | 0.551                      |
| HTR2C rs3813929 polymorphism | 0.484                      |
| HTR2C rs518147 polymorphism  | 0.573                      |

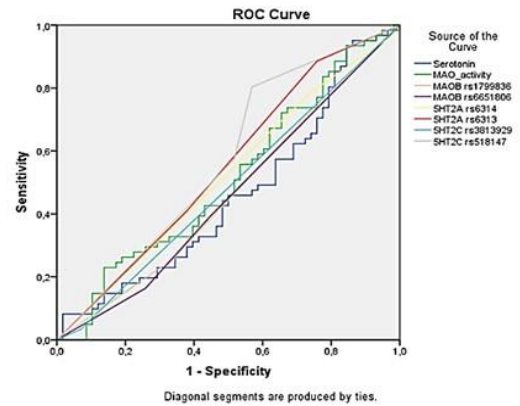

**Figure S2.** Receiver operating characteristic curve (ROC) analysis was performed on the 120 patients with asthma, divided on the severe and non-severe asthma patients and area under the curve (AUC) was determined for variables such as platelet 5-HT concentration and MAO-B activity, as well as gene polymorphisms (MAOB rs1799836, MAOB rs6651806, HTR2A rs6314, HTR2A rs6313, HTR2C rs3813929, and HTR2C rs518147).

**Table S3.** Genotype and allele frequencies of *HTR2A*, *HTR2C*, and *MAOB* polymorphisms in control subjects and asthma patients.

| SNP                    | Genotype N (%) |           |           | $\chi^2$ -test | Allele N (%) |            | $\chi^2$ -test |
|------------------------|----------------|-----------|-----------|----------------|--------------|------------|----------------|
| <i>HTR2A rs6314</i>    | AA             | AG        | GG        |                | A            | G          |                |
| Control subjects       | 2 (1.7)        | 35 (29.2) | 82 (68.3) | $p=0.40$ ;     | 39 (24.0)    | 199 (76.0) | $p=0.18$ ;     |
| Asthma patients        | 1 (0.8)        | 27 (22.5) | 92 (76.7) | $\chi^2=2.94$  | 29 (19.0)    | 211 (81.0) | $\chi^2=1.81$  |
| <i>HTR2A rs6313</i>    | AA             | AG        | GG        |                | A            | G          |                |
| Control subjects       | 26 (21.8)      | 54 (45.4) | 39 (32.8) | $p=0.51$ ;     | 106 (44.5)   | 132 (55.5) | $p=0.23$ ;     |
| Asthma patients        | 21 (17.5)      | 52 (43.3) | 47 (39.2) | $\chi^2=2.31$  | 94 (39.2)    | 146 (60.8) | $\chi^2=1.42$  |
| <i>HTR2C rs3813929</i> | CC/C           | CT        | TT/T      |                | C            | T          |                |
| Control subjects       | 91 (75.8)      | 15 (12.5) | 14 (11.7) | $p=0.17$ ;     | 135 (80.8)   | 32 (19.1)  | $p=0.04$ ;     |
| Asthma patients        | 97 (80.8)      | 17 (14.2) | 6 (5.0)   | $\chi^2=3.52$  | 176 (88.4)   | 23 (11.6)  | $\chi^2=4.11$  |
| <i>HTR2C rs518147</i>  | CC/C           | CG        | GG/G      |                | C            | G          |                |
| Control subjects       | 35 (29.2)      | 21 (17.5) | 64 (53.3) | $p=0.76$ ;     | 63 (37.7)    | 104 (62.3) | $p=0.93$ ;     |
| Asthma patients        | 38 (31.7)      | 17 (14.2) | 65 (54.2) | $\chi^2=0.55$  | 76 (38.2)    | 123 (61.8) | $\chi^2=0.00$  |
| <i>MAOB rs1799836</i>  | CC/C           | CT        | TT/T      |                | C            | T          |                |
| Control subjects       | 45 (37.5)      | 24 (20.0) | 51 (42.5) | $p=0.11$ ;     | 85 (50.9)    | 82 (49.1)  | $p=0.58$ ;     |
| Asthma patients        | 36 (30.0)      | 38 (31.7) | 46 (38.3) | $\chi^2=4.42$  | 107 (53.8.8) | 92 (46.2)  | $\chi^2=0.30$  |
| <i>MAOB rs6651806</i>  | AA/A           | AC        | CC/C      |                | A            | C          |                |
| Control subjects       | 70 (58.3)      | 24 (20.0) | 26 (21.7) | $p=0.98$ ;     | 110 (65.9)   | 57 (34.1)  | $p=0.64$ ;     |
| Asthma patients        | 69 (57.5)      | 25 (20.8) | 25 (20.8) | $\chi^2=0.04$  | 135 (68.2)   | 63 (31.8)  | $\chi^2=0.22$  |

**Table S4.** The distribution of *HTR2C* (rs3813929 and rs518147), and *MAOB* (rs1799836 and rs6651806) haplotypes in control subjects and asthma patients.

| Gene         | Haplotype | Control subjects<br>n (Frequency) | Asthma patients<br>n (Frequency) | $\chi^2$ -test           |
|--------------|-----------|-----------------------------------|----------------------------------|--------------------------|
| <i>HTR2C</i> | CG        | 104 (62.3%)                       | 123 (61.8%),                     | $\chi^2=0.01$ ; $p=0.93$ |
|              | CC        | 31 (18.6%)                        | 53 (26.6%)                       | $\chi^2=3.34$ ; $p=0.07$ |
|              | TC        | 32 (19.2%)                        | 23 (11.6%)                       | $\chi^2=4.11$ ; $p=0.04$ |
| <i>MAOB</i>  | TA        | 84 (50.1%)                        | 102 (51.4%)                      | $\chi^2=0.05$ ; $p=0.81$ |
|              | CC        | 56 (33.4%)                        | 60 (30.3%)                       | $\chi^2=0.39$ ; $p=0.53$ |
|              | CA        | 26 (15.7%)                        | 32 (16.1%)                       | $\chi^2=0.01$ ; $p=0.92$ |
|              | TC        | 1 (0.8%)                          | 4 (2.2%)                         | $\chi^2=1.20$ ; $p=0.27$ |

**Table S5.** Genotype and allele frequencies of *HTR2A*, *HTR2C*, and *MAOB* polymorphisms in non-severe and severe asthma patients.

| SNP                           | Genotype (n, %) |            |             | $\chi^2$ -test | Allele (n, %) |            | $\chi^2$ -test |
|-------------------------------|-----------------|------------|-------------|----------------|---------------|------------|----------------|
| <b><i>HTR2A rs6314</i></b>    | <b>AA</b>       | <b>AG</b>  | <b>GG</b>   |                | <b>A</b>      | <b>G</b>   |                |
| Non-severe asthma             | 0 (0.0)         | 15 (25.4)  | 44 (74.6)   | $p=0.48$ ;     | 15 (12.7)     | 103 (87.3) | $p=0.77$ ;     |
| Severe asthma                 | 1 (1.6)         | 12 (19.7)  | 48 (78.7)   | $\chi^2=1.47$  | 14 (11.5)     | 108 (88.5) | $\chi^2=0.09$  |
| <b><i>HTR2A rs6313</i></b>    | <b>AA</b>       | <b>AG</b>  | <b>GG</b>   |                | <b>A</b>      | <b>G</b>   |                |
| Non-severe asthma             | 14 (23.7)       | 23 (39.0)  | 22 (37.3)   | $p=0.20$ ;     | 51 (43.2)     | 67 (56.8)  | $p=0.21$ ;     |
| Severe asthma                 | 7 (11.5)        | 29 (47.5)  | 25 (41.0)   | $\chi^2=3.28$  | 43 (35.2)     | 79 (64.8)  | $\chi^2=1.60$  |
| <b><i>HTR2C rs3813929</i></b> | <b>CC/C</b>     | <b>CT</b>  | <b>TT/T</b> |                | <b>C</b>      | <b>T</b>   |                |
| Non-severe asthma             | 47 (79.6)       | 8 (13.6)   | 4 (6.8)     | $p=0.67$ ;     | 83 (87.4)     | 12 (12.6)  | $p=0.65$ ;     |
| Severe asthma                 | 50 (82.0)       | 9 (14.8)   | 2 (3.2)     | $\chi^2=0.78$  | 93 (89.4)     | 11 (10.6)  | $\chi^2=0.20$  |
| <b><i>HTR2C rs518147</i></b>  | <b>CC/C</b>     | <b>CG</b>  | <b>GG/G</b> |                | <b>C</b>      | <b>G</b>   |                |
| Non-severe asthma             | 26 (44.07)      | 3 (5.08)   | 30 (50.85)  | $p=0.002$ ;    | 43 (45.3)     | 52 (54.7)  | $p=0.05$ ;     |
| Severe asthma                 | 12 (19.67)      | 14 (22.95) | 35 (57.38)  | $\chi^2=12.63$ | 33 (31.7)     | 71 (68.3)  | $\chi^2=3.85$  |
| <b><i>MAOB rs1799836</i></b>  | <b>CC/C</b>     | <b>CT</b>  | <b>TT/T</b> |                | <b>C</b>      | <b>T</b>   |                |
| Non-severe asthma             | 20 (33.9)       | 17 (28.8)  | 22 (37.3)   | $p=0.63$ ;     | 48 (50.5)     | 47 (49.5)  | $p=0.38$ ;     |
| Severe asthma                 | 16 (26.2)       | 21 (34.4)  | 24 (39.4)   | $\chi^2=0.92$  | 59 (56.7)     | 45 (43.3)  | $\chi^2=0.77$  |
| <b><i>MAOB rs6651806</i></b>  | <b>AA/A</b>     | <b>AC</b>  | <b>CC/C</b> |                | <b>A</b>      | <b>C</b>   |                |
| Non-severe asthma             | 32 (55.2)       | 11 (19.0)  | 15 (25.8)   | $p=0.44$ ;     | 60 (63.2)     | 34 (35.8)  | $p=0.21$ ;     |
| Severe asthma                 | 37 (60.6)       | 14 (23.0)  | 10 (16.4)   | $\chi^2=1.65$  | 75 (72.1)     | 29 (27.9)  | $\chi^2=1.56$  |

**Table S6.** The distribution of *HTR2C* (rs3813929 and rs518147), and *MAOB* (rs1799836 and rs6651806) haplotypes in non-severe and severe asthma patients.

| Gene         | Haplotype | Non-severe asthma<br>n (Frequency) | Severe asthma<br>n (Frequency) | $\chi^2$ -test           |
|--------------|-----------|------------------------------------|--------------------------------|--------------------------|
| <i>HTR2C</i> | CG        | 52 (54.7%)                         | 71 (68.3%)                     | $\chi^2=3.85$ ; $p=0.05$ |
|              | CC        | 31 (32.6%)                         | 22 (21.2%)                     | $\chi^2=3.35$ ; $p=0.07$ |
|              | TC        | 12 (12.6%)                         | 11 (10.6%)                     | $\chi^2=0.20$ ; $p=0.65$ |
| <i>MAOB</i>  | TA        | 44 (46.3%)                         | 58 (55.8%)                     | $\chi^2=1.22$ ; $p=0.27$ |
|              | CC        | 31 (32.6%)                         | 28 (26.9%)                     | $\chi^2=0.90$ ; $p=0.34$ |
|              | CA        | 16 (16.8%)                         | 17 (16.3%)                     | $\chi^2=0.00$ ; $p=0.98$ |
|              | TC        | 3 (3.2%)                           | 1 (1.0%)                       | $\chi^2=0.49$ ; $p=0.49$ |
